# Supplementary material for: Altered functional organization within the insular cortex in adult males with high-functioning autism spectrum disorder: evidence from connectivity-based parcellation
Source: PubMed Central journal article supplement (PMC5052801; doi:10.1186/s13229-016-0106-8), 2016-10-05

**a****AD (TD) vs Anterior section (ASD)**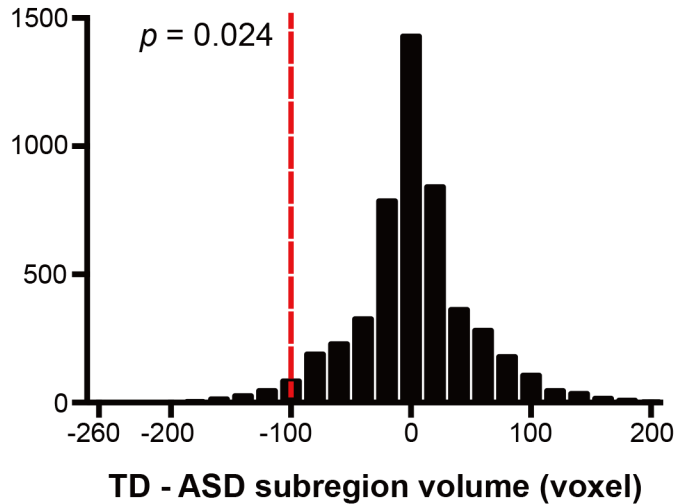**b****MV (TD) vs MV (ASD)**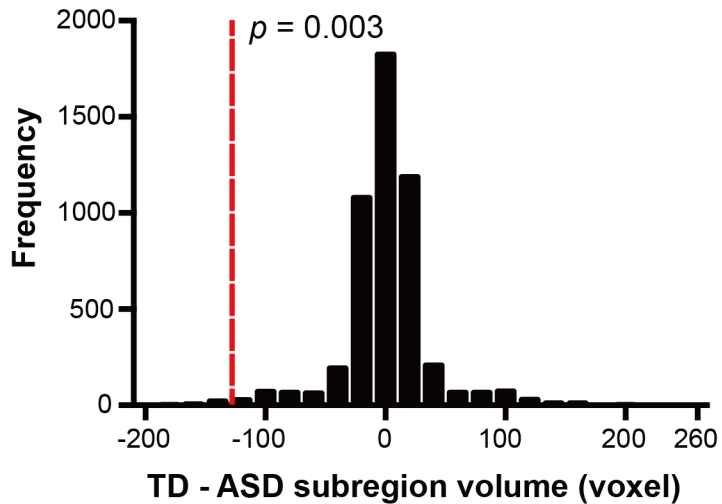

Supplement: 13229_2016_106_MOESM1_ESM.pdf [file 13229_2016_106_MOESM1_ESM.pdf]
